# Supplementary material for: Exploration and Exploitation of Novel SSR Markers for Candidate Transcription Factor Genes in Lilium Species
Source: MDPI journal article supplement (doi:10.3390/genes9020097), 2018-02-14
Supplement: s1 [file s1]

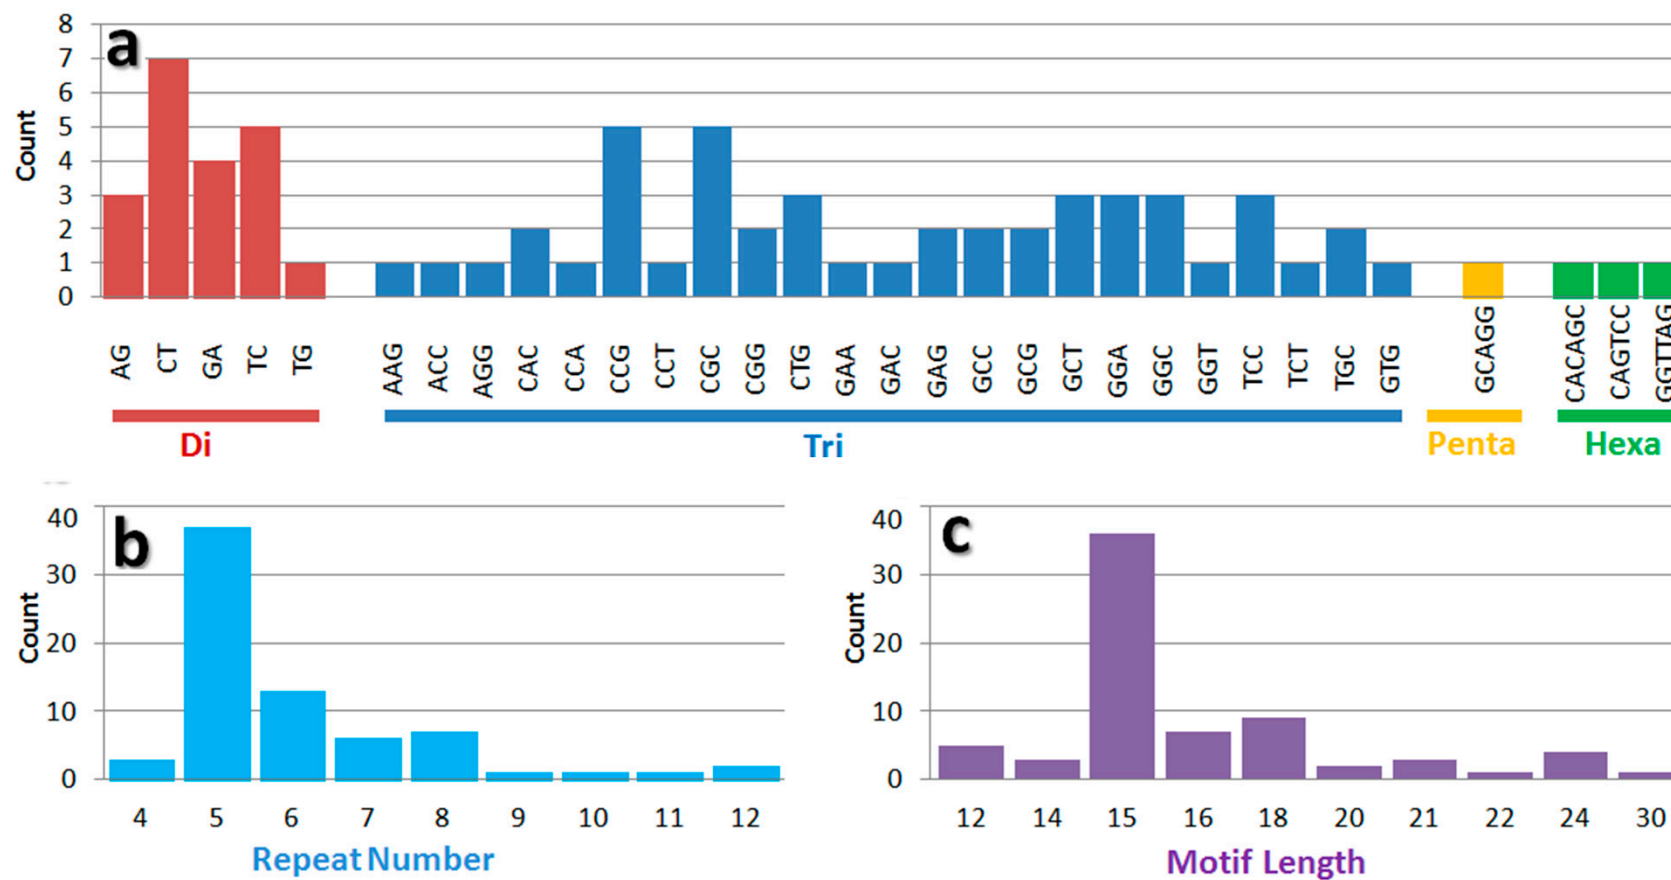

**Figure S1.** Distribution of SSR motifs: (a) motif types, (b) repeat number, and (c) motif length.

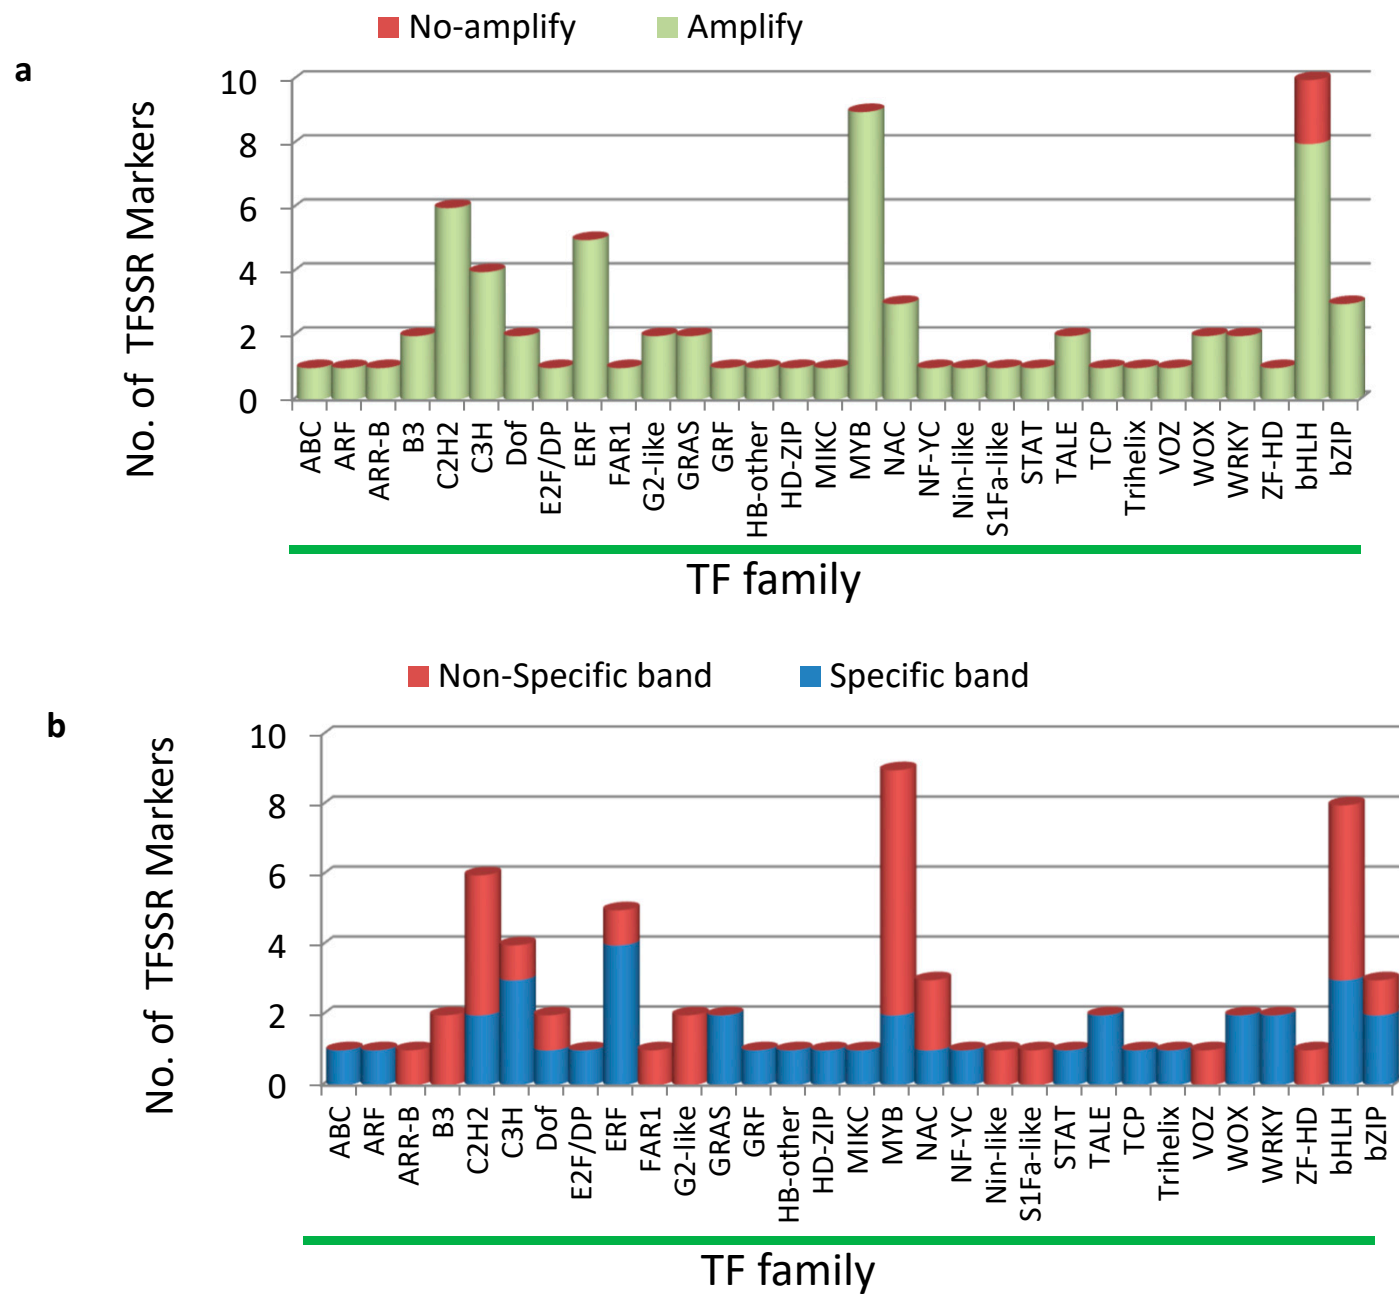

**Figure S2.** Evaluation of TFSSR markers based on wet lab of 31 TF families (a) based on nPCR amplification and (b) based on band specificity.

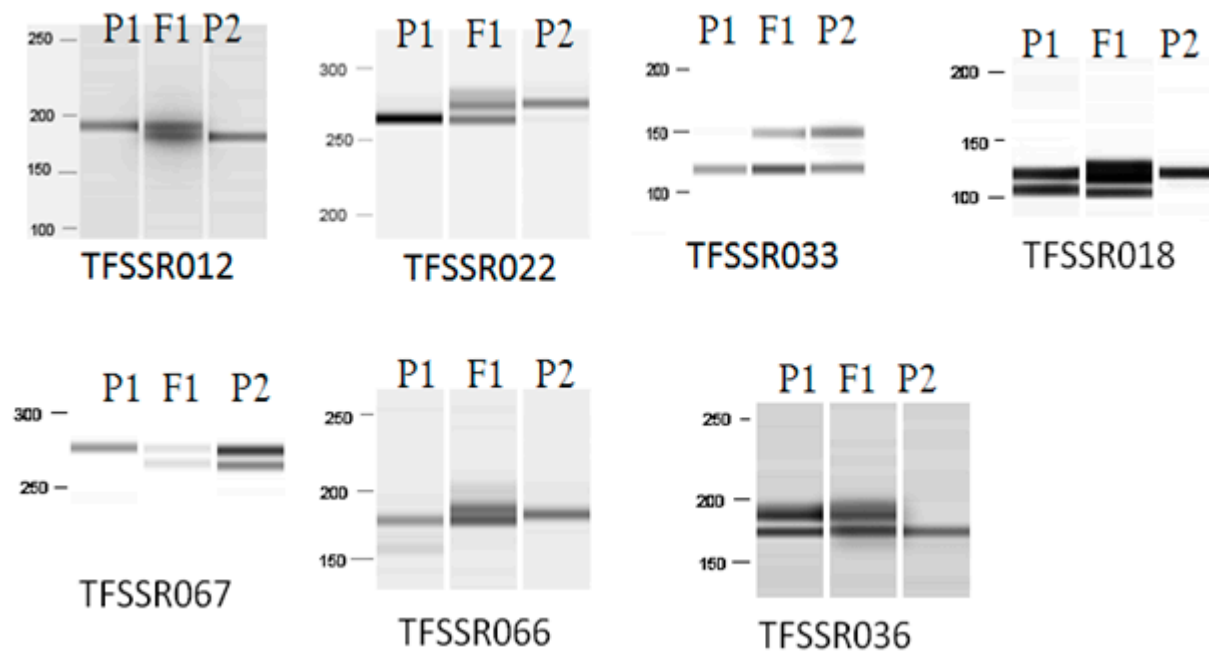

**Figure S3.** Banding profile of the 7 TFSSR markers able to identify hybrid crosses between inbred lines *Lilium longiflorum* (**Easter lily**) L2-4 and *Lilium longiflorum* (**Easter lily**) L2-28. [P1= L2-4 P2= L2-28 and F1= L2-4X L2-28].

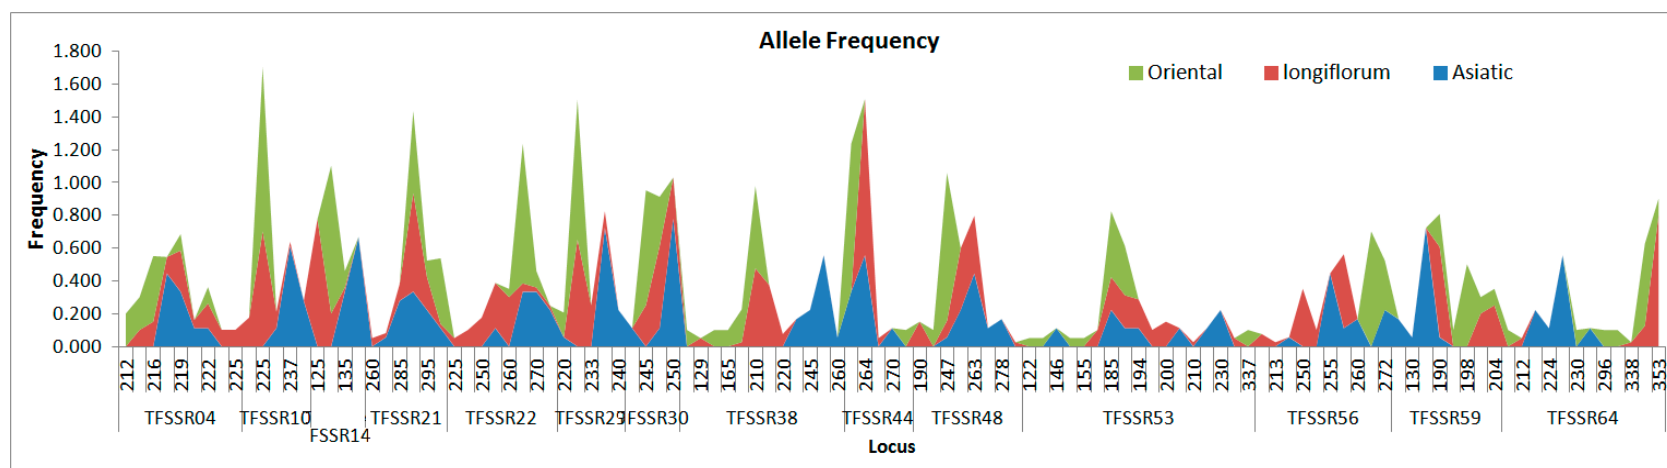

**Figure S4.** Allele frequencies by population.

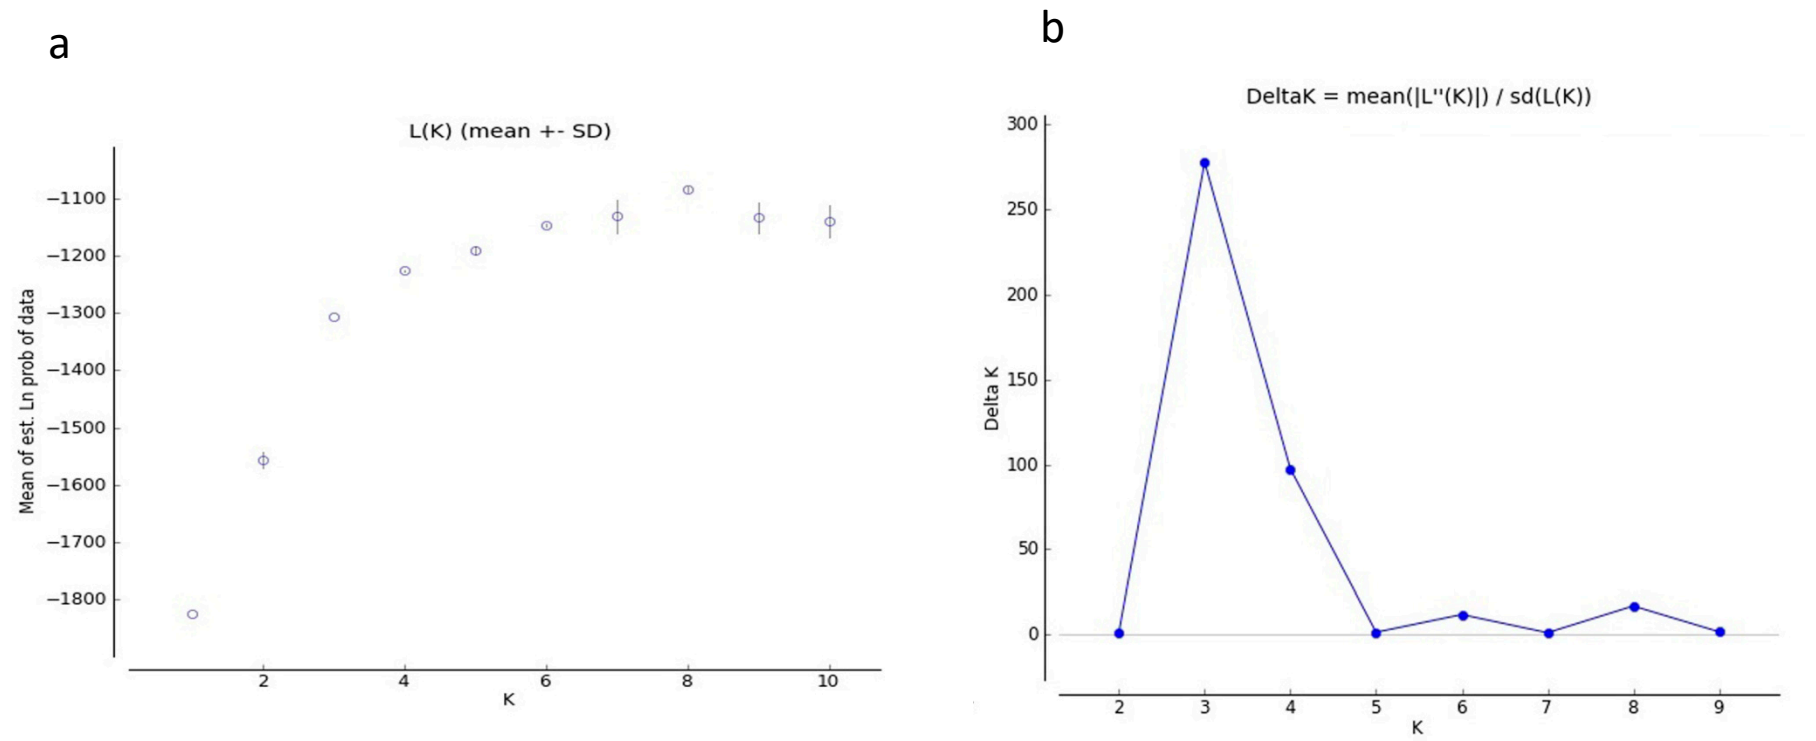

**Figure S5.** (a) Estimated log likelihood of the data;  $\text{LnP}(D)$  over 10 repeats of STRUCTURE analysis and (b) the true value of K was obtained following the delta-K method of Evanno et al. [37].
